# Supplementary material for: Myocardin Overexpression Is Sufficient for Promoting the Development of a Mature Smooth Muscle Cell-Like Phenotype from Human Embryonic Stem Cells
Source: PubMed Central journal article supplement (PMC3429416; doi:10.1371/journal.pone.0044052), 2012-08-28

Supplementary Figure S1

$0.5 \times 10^6/\text{ml}$

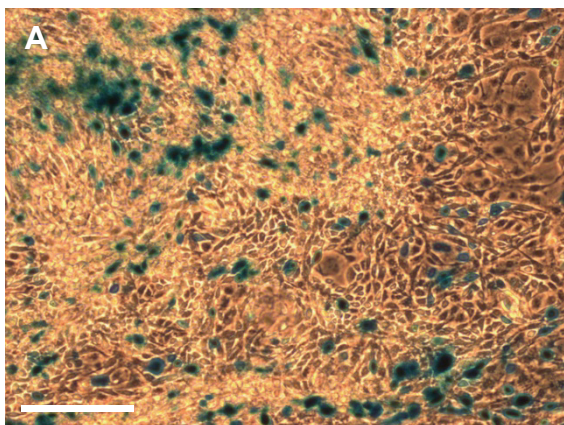

$1.5 \times 10^6/\text{ml}$

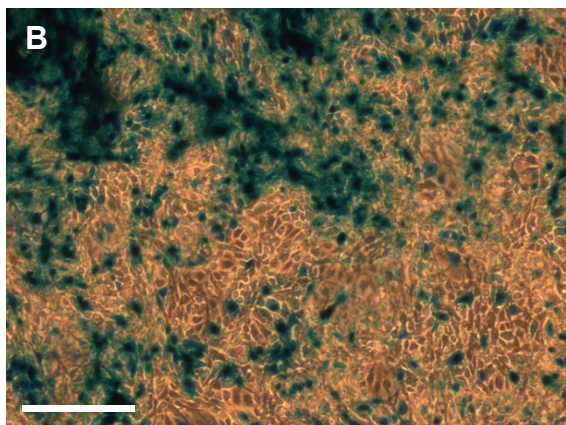

$0.5 \times 10^7/\text{ml}$

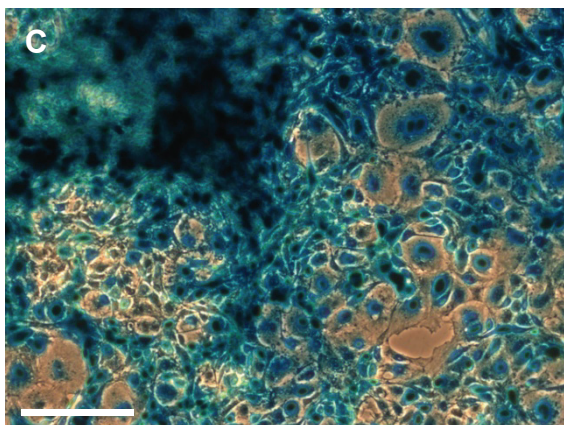

$1.5 \times 10^7/\text{ml}$

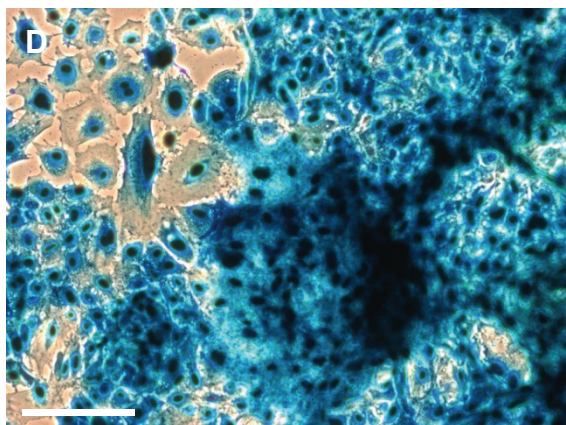

Supplement: pone.0044052.s001.pdf [file pone.0044052.s001.pdf]
