# Supplementary material for: Myocardin Overexpression Is Sufficient for Promoting the Development of a Mature Smooth Muscle Cell-Like Phenotype from Human Embryonic Stem Cells
Source: PubMed Central journal article supplement (PMC3429416; doi:10.1371/journal.pone.0044052), 2012-08-28

Supplementary Figure S5

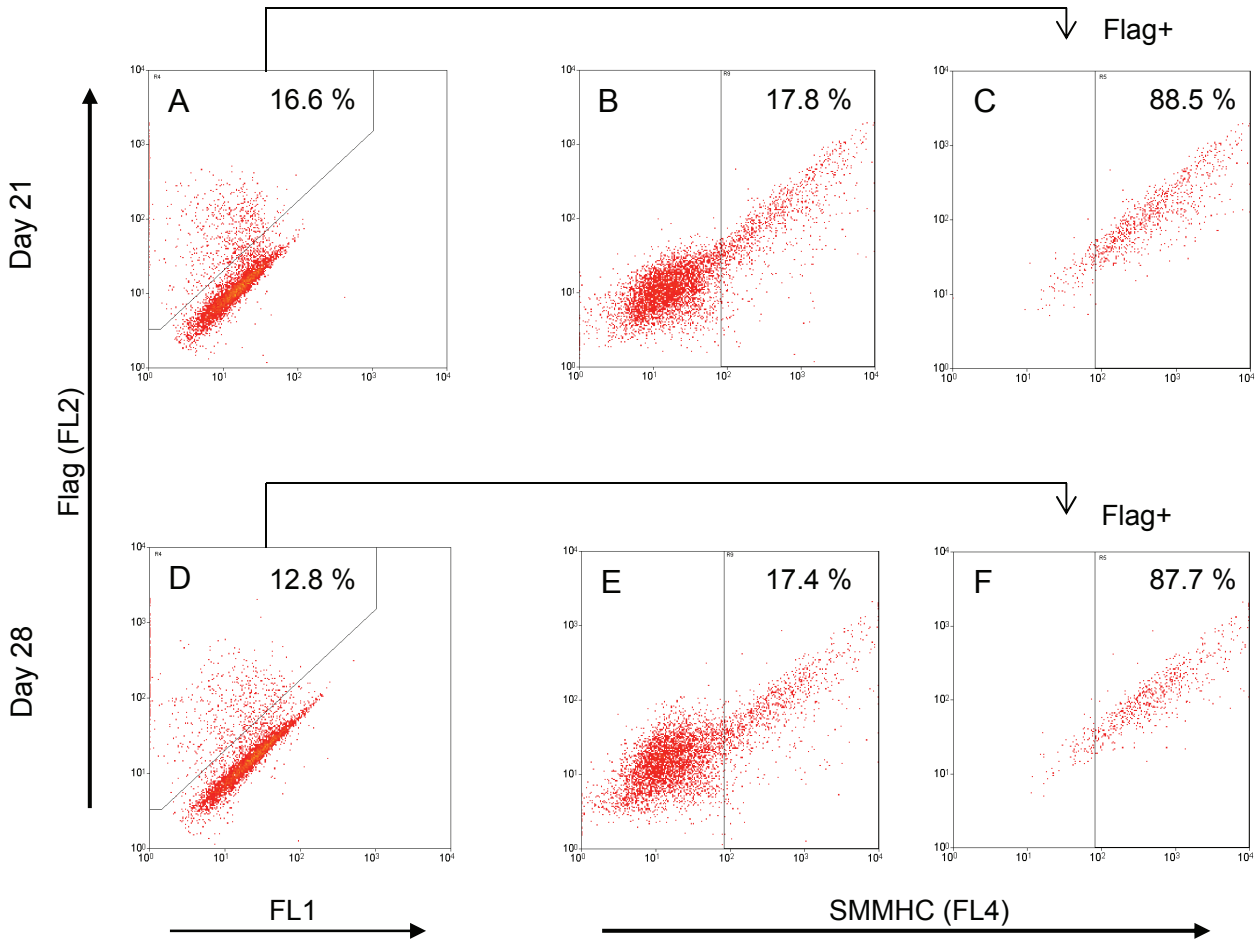

Supplement: pone.0044052.s005.pdf [file pone.0044052.s005.pdf]
