# Supplementary material for: Myocardin Overexpression Is Sufficient for Promoting the Development of a Mature Smooth Muscle Cell-Like Phenotype from Human Embryonic Stem Cells
Source: PLOS journal article supplement (doi:10.1371/journal.pone.0044052), 2012-08-28

Supplementary Figure S2

Ad-LacZ

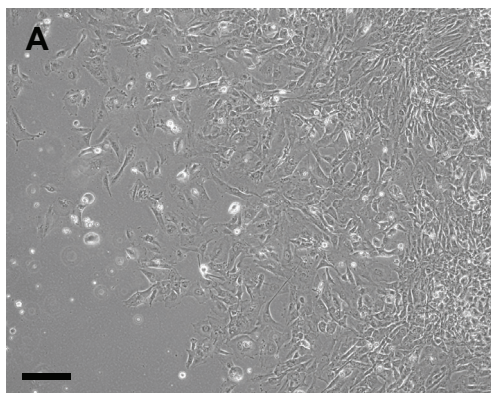

Ad-Myo

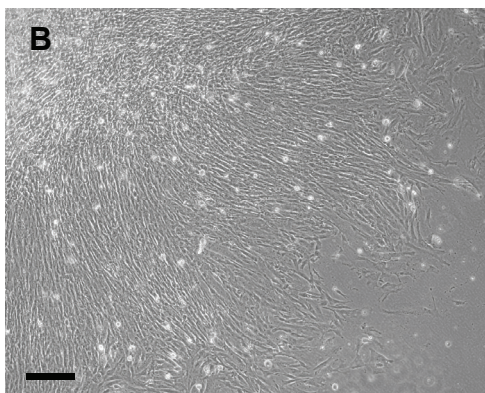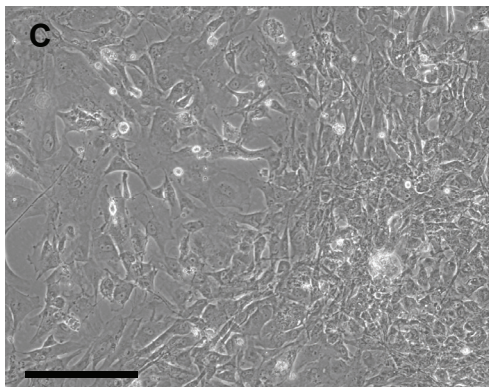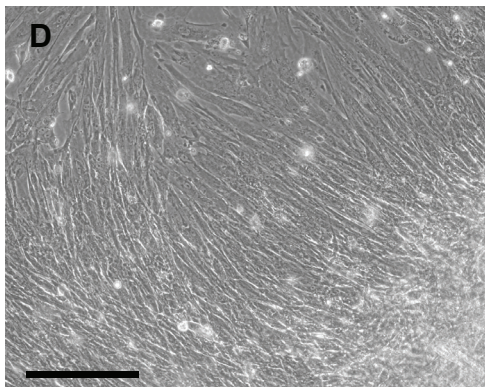

Supplement: S2 (10.1371/journal.pone.0044052.s002) [file journal.pone.0044052.s002]
